# Supplementary material
Source: PubMed Central journal article supplement (PMC4624160)
Supplement: mmc1.pdf [file mmc1.pdf]

# **Disorder-to-order transition of an active-site loop mediates the allosteric activation of sortase A**

Xiaodong Pang and Huan-Xiang Zhou\*

Department of Physics and Institute of Molecular Biophysics, Florida State University,  
Tallahassee, FL 32306

## **SUPPORTING MATERIAL**

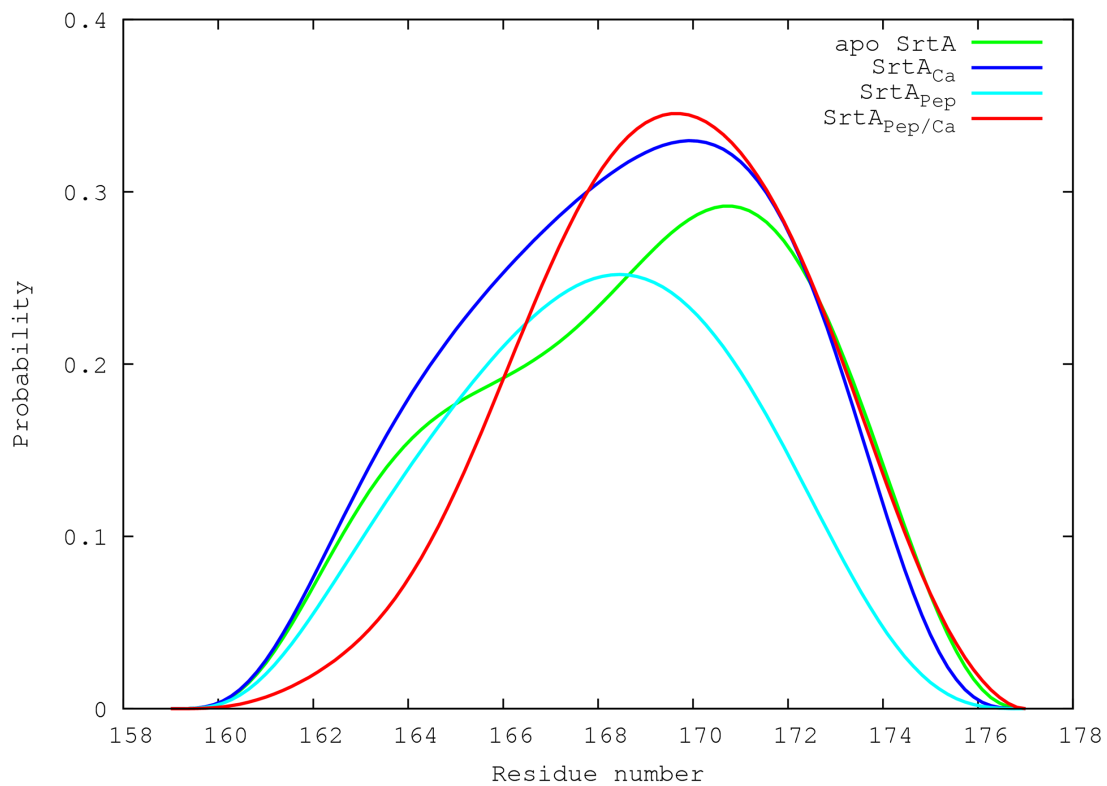

Figure S1 Distributions of the probabilities of residues in the active-site loop for forming  $3_{10}$  helix, obtained from the REST simulations on sortase A in the apo form and in the three liganded forms.

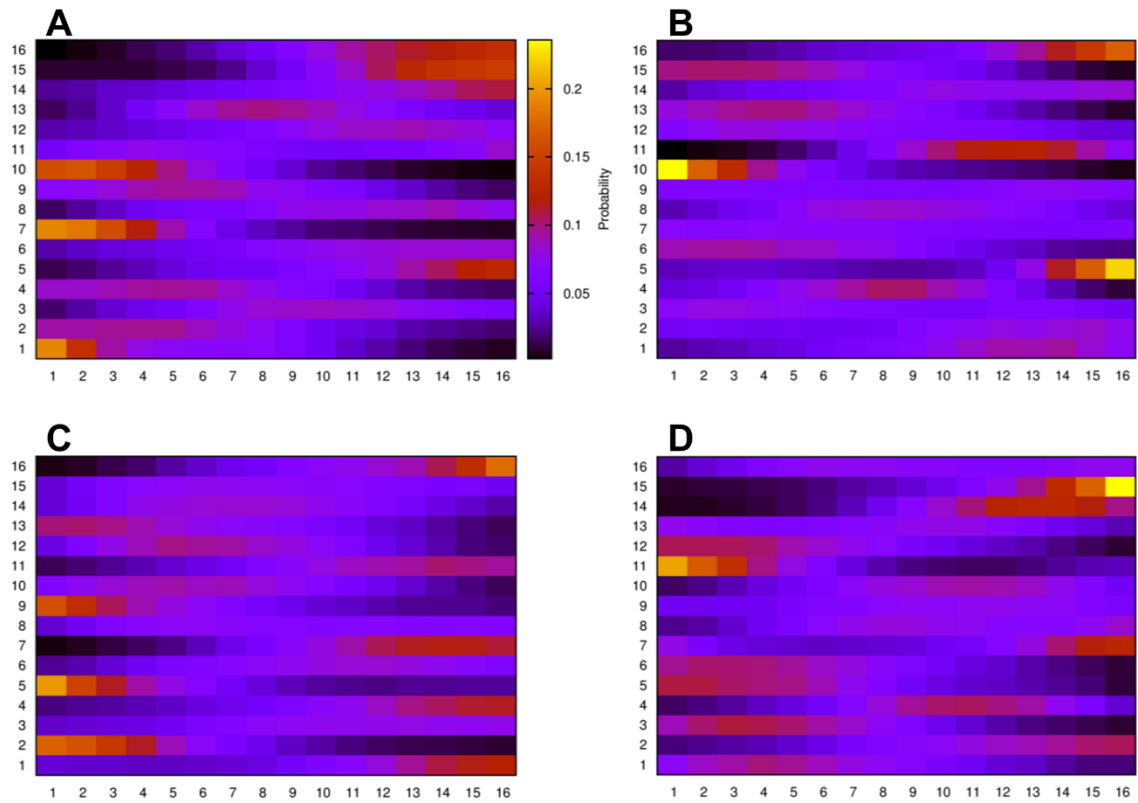

Figure S2 Probabilities of each replica, started from a particular position along the temperature ladder, to be at all the 16 positions in the ladder during the 100-ns simulations. The vertical axis indicates the starting position. (A) Apo SrtA. (B) SrtA<sub>Ca</sub>. (C) StrA<sub>Pep</sub>. (D) StrA<sub>Pep/Ca</sub>.

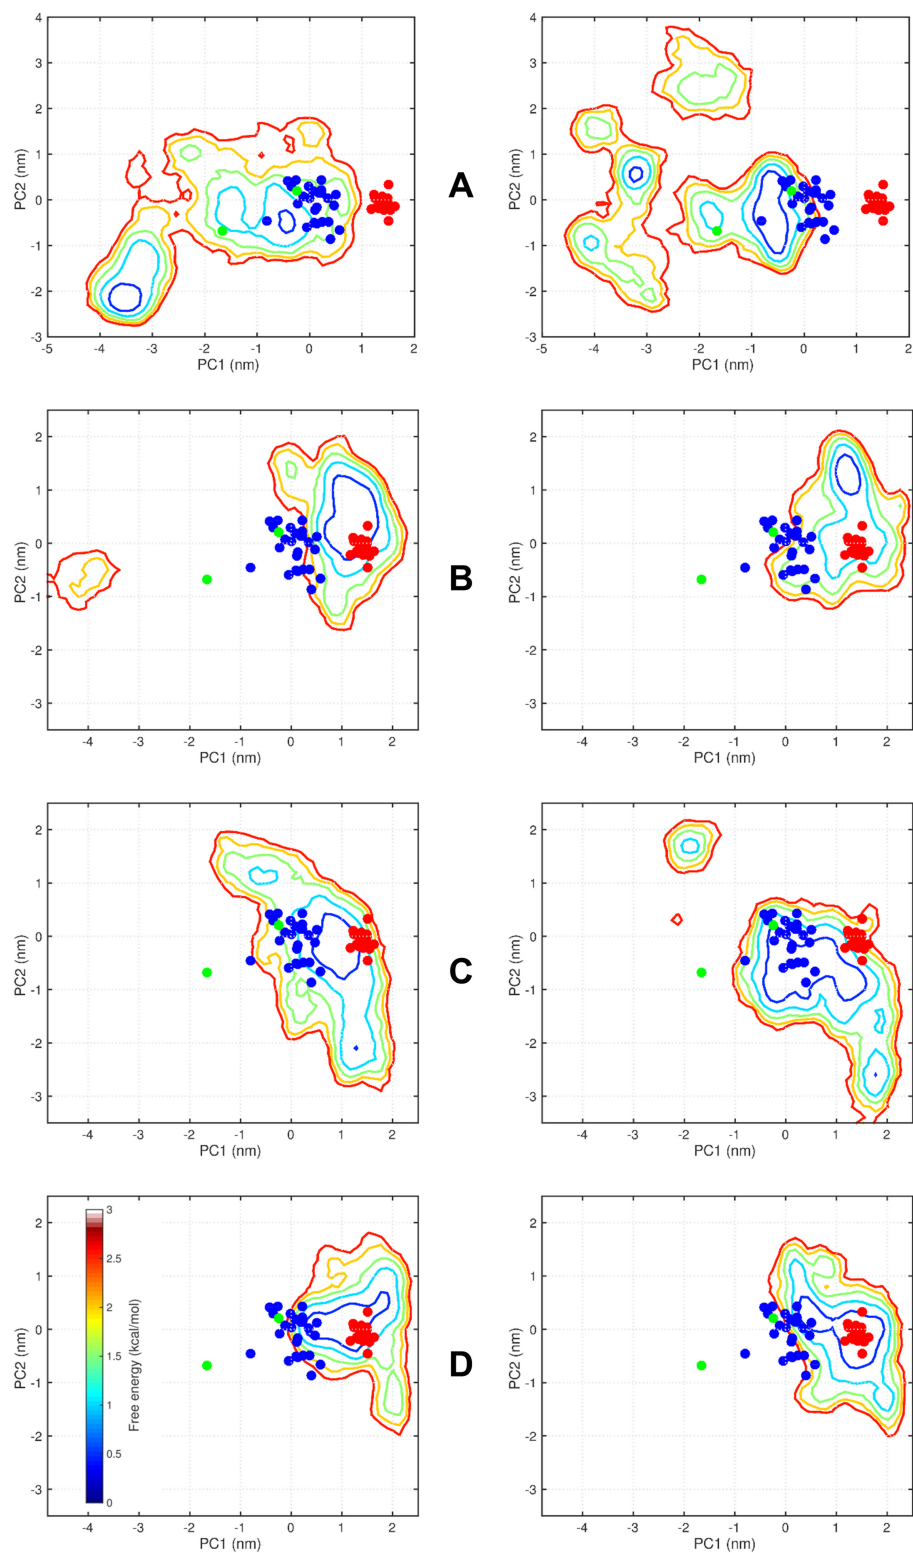

Figure S3 Conformational ensembles of the four forms of SrtA. (A) Apo. (B) SrtA<sub>Ca</sub>. (C) StrA<sub>Pep</sub>. (D) StrA<sub>Pep/Ca</sub>. Left and right panels display results calculated from 0-50 ns and 50-100 ns of the simulations.

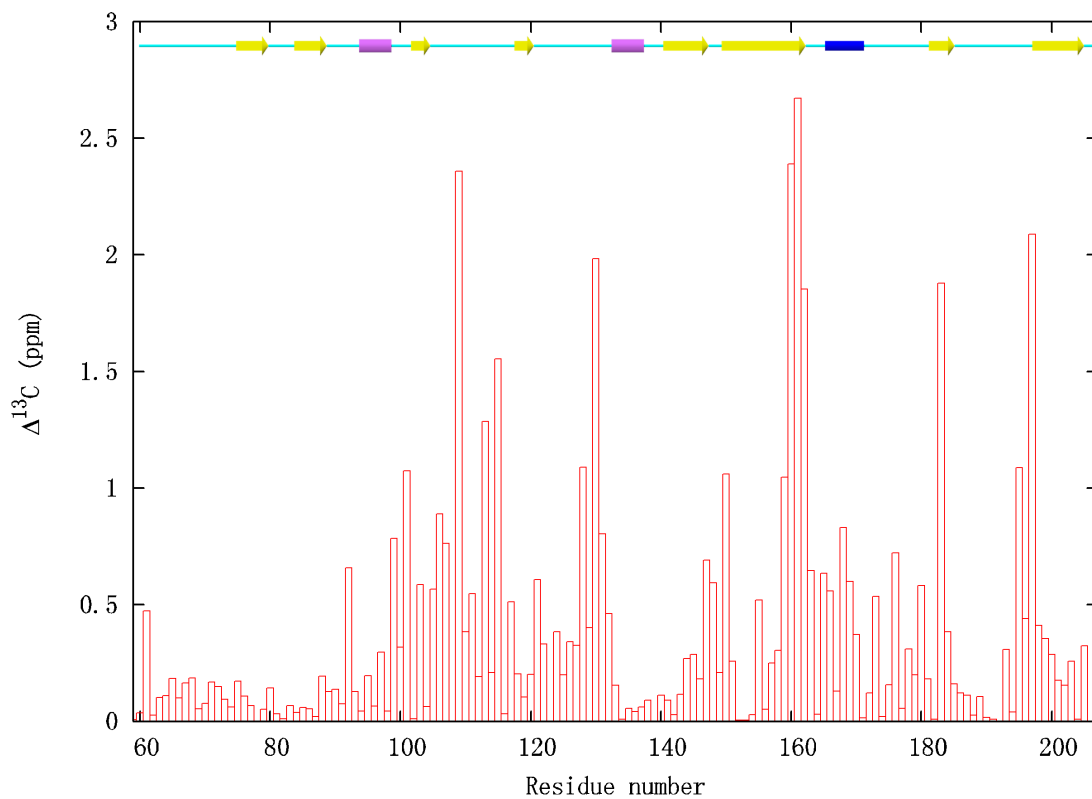

Figure S4 Predicted changes in C $\alpha$  chemical shifts of sortase A upon Ca<sup>2+</sup> binding. The secondary structure of the protein is shown at the top.
